# Supplementary material for: Overall survival after treatment for metastatic uveal melanoma: a systematic review and meta-analysis
Source: PubMed Central journal article supplement (PMC6887637; doi:10.1097/cmr.0000000000000575), 2019-01-16
Supplement: mr-29-561-s001.pdf [file mr-29-561-s001.pdf]

**Supplemental digital content 1.pdf - PubMed search strategy**

PubMed search:

(uveal melanoma OR choroidal melanoma OR ciliary body melanoma OR ciliochoroidal melanoma OR iridociliary melanoma OR iris melanoma OR intraocular melanoma OR ocular melanoma) AND (metast\* OR stage IV) AND (treatment) AND (“1980/01/01” [PDAT] : “2017/03/29” [PDAT]).

The search was performed on March the 29th 2017.
